# Supplementary material for: Visible light mediated cyclization of tertiary anilines with maleimides using a supported iridium complex catalyst
Source: Royal Society of Chemistry journal article supplement (doi:10.1039/c7ra01045a), 2017-01-01

## Visible Light Mediated Cyclization of Tertiary Anilines with Maleimides Using Supported Iridium Complex Catalyst

Feng Peng,<sup>a</sup> Peng Zhi,<sup>a</sup> HengJi,<sup>a,b</sup> HuanZhao,<sup>a</sup> Fen-ying Kong,<sup>b</sup>  
Xue-Zheng Liang\*<sup>a</sup> and Yong-Miao Shen\*<sup>a</sup>

<sup>a</sup>Key Laboratory of Clean Dyeing and Finishing Technology of Zhejiang Province,  
School of Chemistry and Chemical Engineering, Shaoxing University, Shaoxing  
312000, China

<sup>b</sup>School of Chemistry and Chemical Engineering, Yancheng Institute of Technology,  
224051, China

Corresponding authors: [liangxuezheng@126.com](mailto:liangxuezheng@126.com), [shenyongmiao@usx.edu.cn](mailto:shenyongmiao@usx.edu.cn)

### Supporting Information

1. General information.....S2
2. Photoreaction setup.....S2
3. Centrifugal separation of the P4 photocatalyst.....S3
4. Spectral data of products **3a-3s**..... S3-10
5. <sup>1</sup>H NMR of compounds **3a-3s** and <sup>13</sup>C NMR of compounds **3m-3p, 3s** ..... S10-21

## 1. General information

All reagents were commercially available and used without further purification. All solvents were dried according to standard procedures. Melting points were measured on a Taike X-4 microscopic melting point apparatus and are uncorrected.  $^1\text{H}$  and  $^{13}\text{C}$  NMR spectra were measured on a Bruker ACF-400 spectrometer and recorded at 400 and 100 MHz, respectively, using  $\text{CDCl}_3$  as solvent. IR spectra were taken with a Nicolet FT-IR 5DX spectrometer. UV-vis absorption spectroscopy was measured on a Shimadzu 2550 spectrometer. Mass spectra were recorded with a VG ZAB-HS spectrometer using ESI techniques. HRMS were taken with a AB TripleTOF 5600 plus System (AB SCIEX, Framingham, USA). The exact mass calibration was performed automatically before each analysis employing the Automated Calibration Delivery System. Elemental analyses were obtained using a Heraeus CHN-O-Rapid analyzer. XRD were measured with PANalytical Empyrean. TEM were measured with a JEM-1011. TEM-EDS were measured with a JSM-6360LV, ICP-AES were recorded at a Leeman Prodigy xp. The Brunauer-Emmett-Teller (BET) surface area was measured using a Micromeritics Empyrean instrument.

## 2. Photoreaction setup

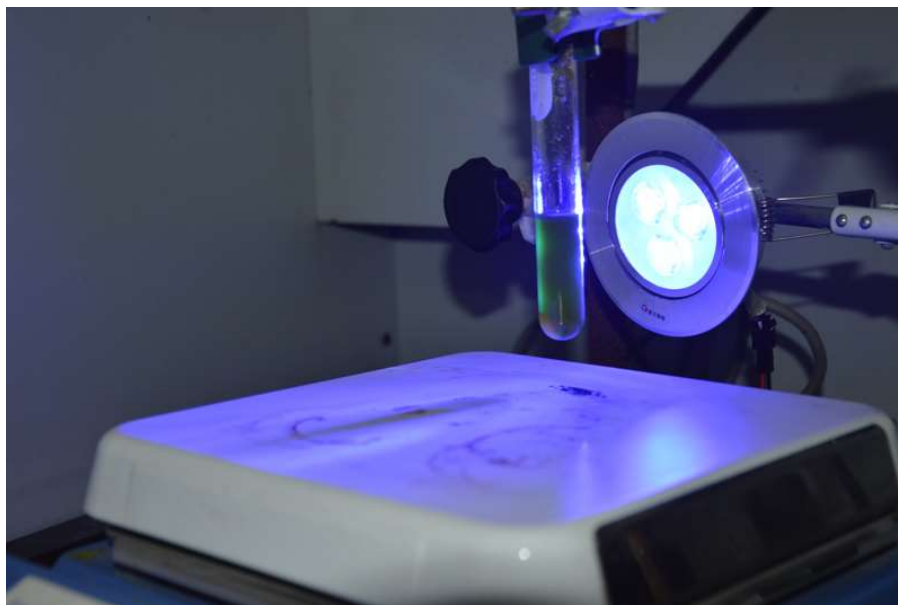

Fig. 1s Photoreaction setup for the cyclization reactions.

### 3. Centrifugal separation of the P4photocatalyst

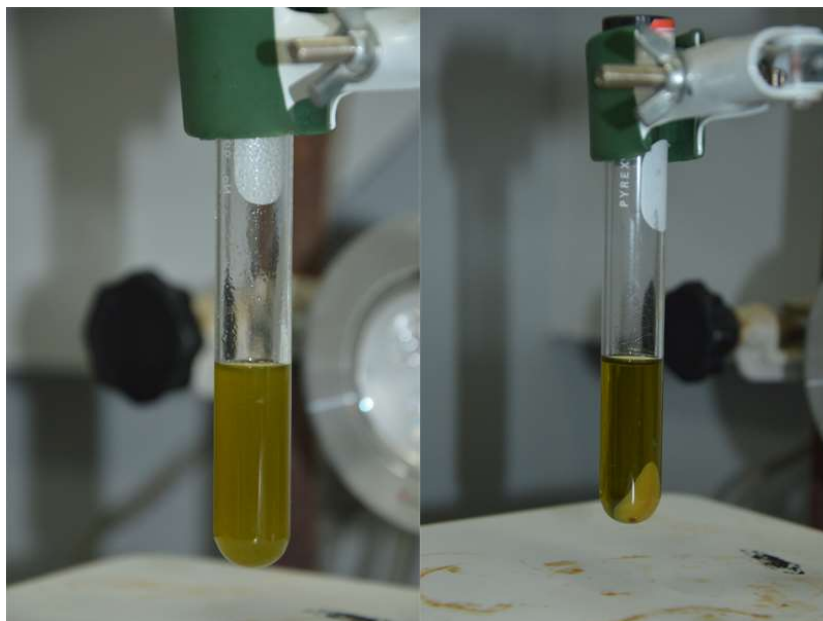

Fig. 2s Centrifugal separation of the P4 photocatalyst (Left) Before the centrifugal (Right) After the centrifugal.

### 4. Analytical data for the synthesized compounds

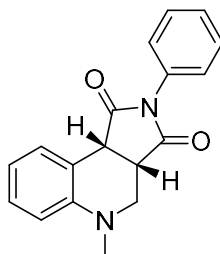

(3a*S*\*,9b*R*\*)-5-methyl-2-phenyl-3a,4,5,9b-tetrahydro-1*H*-pyrrolo[3,4-*c*]quinoline-1,3(2*H*)-dione (**3a**) 105.3 mg. White solid:  $R_f = 0.45$  (petroleum ether/ethyl acetate 30:8); m.p. 202-204 °C<sup>[1]</sup>; <sup>1</sup>H NMR (400 MHz, CDCl<sub>3</sub>)  $\delta$  2.84 (s, 3H), 3.13 (dd, 1H,  $J = 11.6, 4.4$  Hz), 3.55 (ddd, 1H,  $J = 9.6, 4.3, 2.7$  Hz), 3.62 (dd, 1H,  $J = 11.6, 2.8$  Hz), 4.17 (d, 1H,  $J = 9.6$  Hz), 6.75 (d, 1H,  $J = 8.0$  Hz), 6.91 (td, 1H,  $J = 8.4, 1.0$  Hz), 7.22 – 7.28 (m, 3H), 7.36–7.44 (m, 3H), 7.53 (d, 1H,  $J = 7.6$  Hz).

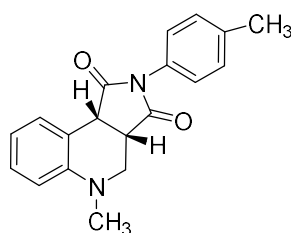

(3a*S*\*,9b*R*\*)-5-methyl-2-(*p*-tolyl)-3a,4,5,9b-tetrahydro-1*H*-pyrrolo[3,4-*c*]quinoline-1,

*3(2H)-dione(3b)* 133.7 mg. White solid:  $R_f = 0.47$  (petroleum ether/ethyl acetate 30:8); m.p. 212-214 °C;  $^1\text{H NMR}$  (400 MHz,  $\text{CDCl}_3$ )  $\delta$  2.36 (s, 3H), 2.85 (s, 3H), 3.15 (dt, 1H,  $J = 11.5, 4.1$  Hz), 3.55 (ddd, 1H,  $J = 9.6, 4.5, 2.8$  Hz), 3.60 – 3.64 (m, 1H), 4.16 (d, 1H,  $J = 9.5$  Hz), 6.76 – 6.82 (m, 1H), 6.93 (td, 1H,  $J = 7.5, 2.5$  Hz), 7.12–7.16 (m, 2H), 7.20–7.25 (m, 3H), 7.52 (d, 1H,  $J = 7.6$  Hz).

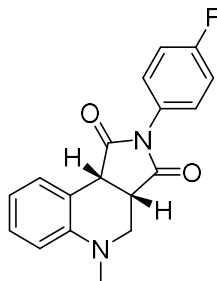

*(3aS\*,9bR\*)-2-(4-fluorophenyl)-5-methyl-3a,4,5,9b-tetrahydro-1H-pyrrolo[3,4-c]quinoline-1,3(2H)-dione(3c)* 77.1 mg. White solid:  $R_f = 0.42$  (petroleum ether/ethyl acetate 30:8); m.p. 172-174 °C;  $^1\text{H NMR}$  (400 MHz,  $\text{CDCl}_3$ )  $\delta$  2.84 (s, 3H), 3.13 (dd, 1H,  $J = 11.5, 4.4$  Hz), 3.54 (ddd, 1H,  $J = 9.6, 4.3, 2.7$  Hz), 3.60 (dd, 1H,  $J = 11.5, 2.7$  Hz), 4.15 (d, 1H,  $J = 9.6$  Hz), 6.75 (d, 1H,  $J = 7.6$  Hz), 6.91 (td, 1H,  $J = 7.5, 1.1$  Hz), 7.07-7.15 (m, 2H), 7.21-7.28 (m, 3H), 7.52 (d, 1H,  $J = 7.5$  Hz).

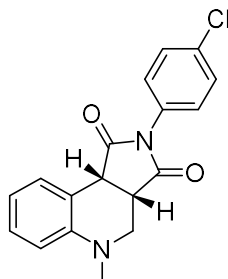

*(3aS\*,9bR\*)-2-(4-chlorophenyl)-5-methyl-3a,4,5,9b-tetrahydro-1H-pyrrolo[3,4-c]quinoline-1,3(2H)-dione(3d)* 96.4 mg. White solid:  $R_f = 0.41$  (petroleum ether/ethyl acetate 30:8); m.p. 188-190 °C;  $^1\text{H NMR}$  (400 MHz,  $\text{CDCl}_3$ )  $\delta$  2.84 (s, 3H), 3.12 (dd, 1H,  $J = 11.5, 4.3$  Hz), 3.55 (ddd, 1H,  $J = 9.6, 4.3, 2.6$  Hz), 3.62 (dd, 1H,  $J = 11.5, 2.6$  Hz), 4.17 (d, 1H,  $J = 9.6$  Hz), 6.75 (d, 1H,  $J = 8.2$  Hz), 6.92 (td, 1H,  $J = 7.5, 1.1$  Hz), 7.22-7.26 (m, 3H), 7.37-7.41 (m, 2H), 7.52 (d, 1H,  $J = 7.4$  Hz).

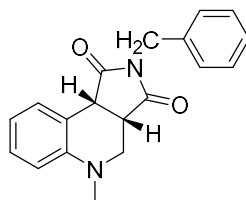

*(3aS\*,9bR\*)-2-benzyl-5-methyl-3a,4,5,9b-tetrahydro-1H-pyrrolo[3,4-c]quinoline-1,3(2H)-dione (3e)* 79.6 mg. White solid:  $R_f = 0.45$  (petroleum ether/ethyl acetate 30:8); m.p. 126-128 °C;  $^1\text{H NMR}$  (400 MHz,  $\text{CDCl}_3$ )  $\delta$  2.72 (s, 3H), 2.97 (dd, 1H,  $J = 11.5, 4.5$  Hz), 3.25 – 3.32 (m, 1H), 3.42 (dd, 1H,  $J = 11.5, 2.7$  Hz), 3.92 (d, 1H,  $J = 9.4$  Hz), 4.58 (q, 2H,  $J = 14.3$  Hz), 6.64 (d, 1H,  $J = 8.1$  Hz), 6.82 (td, 1H,  $J = 7.5, 0.9$  Hz), 7.12-7.24 (m, 6H), 7.39 (d, 1H,  $J = 7.3$  Hz).

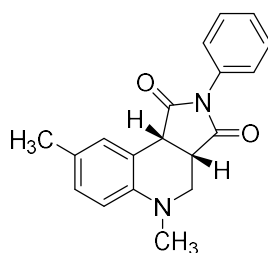

(3aS\*,9bR\*)-5,8-dimethyl-2-phenyl-3a,4,5,9b-tetrahydro-1H-pyrrolo[3,4-c]quinoline-1,3(2H)-dione(**3f**) 132.4 mg. White solid:  $R_f = 0.50$  (petroleum ether/ethyl acetate 30:8); m.p. 193-195 °C;  $^1\text{H NMR}$  (400 MHz,  $\text{CDCl}_3$ )  $\delta$  2.30 (s, 3H), 2.80 (s, 3H), 3.06 (dd, 1H,  $J = 11.4, 4.3$  Hz), 3.52 (ddd, 1H,  $J = 9.5, 4.3, 2.7$  Hz), 3.59 (dd, 1H,  $J = 11.4, 2.7$  Hz), 4.12 (d, 1H,  $J = 9.6$  Hz), 6.65 (d, 1H,  $J = 8.3$  Hz), 7.04 (dd, 1H,  $J = 8.3, 1.7$  Hz), 7.26-7.28 (m, 2H), 7.33-7.37 (m, 2H), 7.41-7.45 (m, 2H).

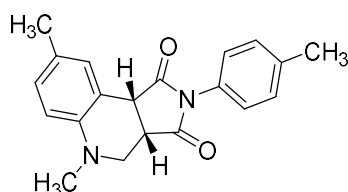

(3aS\*,9bR\*)-5,8-dimethyl-2-(p-tolyl)-3a,4,5,9b-tetrahydro-1H-pyrrolo[3,4-c]quinoline-1,3(2H)-dione(**3g**) 143.1 mg. White solid:  $R_f = 0.47$  (petroleum ether/ethyl acetate 6:1); m.p. 207-208 °C;  $^1\text{H NMR}$  (400 MHz,  $\text{CDCl}_3$ )  $\delta$  2.32 (s, 3H), 2.36 (s, 3H), 2.84 (s, 3H), 3.14 (dd, 1H,  $J = 11.6, 4.4$  Hz), 3.53 – 3.58 (m, 1H), 3.62 (dd, 1H,  $J = 11.6, 2.8$  Hz), 4.14 (d, 1H,  $J = 9.6$  Hz), 6.77 (d, 1H,  $J = 8.0$  Hz), 7.06 (dd, 1H,  $J = 8.0, 2.0$  Hz), 7.13 (dd, 2H,  $J = 8.4, 2.0$  Hz), 7.23 (d, 2H,  $J = 8.2$  Hz), 7.39 (d, 1H,  $J = 0.8$  Hz).

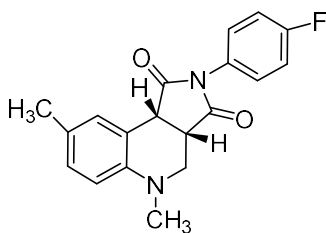

(3aS\*,9bR\*)-2-(4-fluorophenyl)-5,8-dimethyl-3a,4,5,9b-tetrahydro-1H-pyrrolo[3,4-c]quinoline-1,3(2H)-dione(**3h**) 100.2 mg. White solid:  $R_f = 0.42$  (petroleum ether/ethyl acetate 5:1); m.p. 157-159 °C;  $^1\text{H NMR}$  (400 MHz,  $\text{CDCl}_3$ )  $\delta$  2.30 (s, 3H), 2.80 (s, 3H), 3.06 (dd, 1H,  $J = 11.4, 4.3$  Hz), 3.49 – 3.56 (m, 1H), 3.59 (dd, 1H,  $J = 11.4, 2.6$  Hz), 4.13 (d, 1H,  $J = 9.6$  Hz), 6.66 (d, 1H,  $J = 8.3$  Hz), 7.04 (dd, 1H,  $J = 8.4, 1.6$  Hz), 7.09-7.13 (m, 2H), 7.254-7.27 (m, 2H), 7.32 (s, 1H).

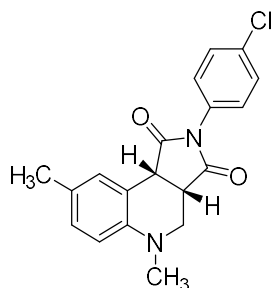

(3aS\*,9bR\*)-2-(4-chlorophenyl)-5,8-dimethyl-3a,4,5,9b-tetrahydro-1H-pyrrolo[3,4-c]quinoline-1,3(2H)-dione(**3i**) 129.5 mg. White solid:  $R_f = 0.40$  (petroleum ether/ethyl acetate 30:8); m.p. 178-180 °C;  $^1\text{H NMR}$  (400 MHz,  $\text{CDCl}_3$ )  $\delta$  2.31 (s, 3H), 2.81 (s, 3H), 3.07 (dd, 1H,  $J = 11.4, 4.3$  Hz), 3.53 (ddd, 1H,  $J = 9.6, 4.3, 2.6$  Hz), 3.59 (dd, 1H,  $J = 11.4, 2.6$  Hz), 4.13 (d, 1H,  $J = 9.6$  Hz), 6.67 (d, 1H,  $J = 9.6$  Hz), 7.05 (dd, 1H,  $J = 8.3, 2.0$  Hz), 7.24-7.26 (m, 2H), 7.34 (d, 1H,  $J = 1.6$  Hz), 7.38-7.41 (m, 2H).

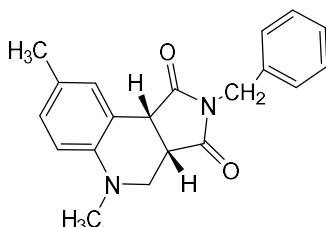

(3aS\*,9bR\*)-2-benzyl-5,8-dimethyl-3a,4,5,9b-tetrahydro-1H-pyrrolo[3,4-c]quinoline-1,3(2H)-dione(**3j**) 105.5 mg. White solid:  $R_f = 0.45$  (petroleum ether/ethyl acetate 30:7); m.p. 131-136 °C;  $^1\text{H NMR}$  (400 MHz,  $\text{CDCl}_3$ )  $\delta$  2.30 (s, 3H), 2.77 (s, 3H), 3.00 (dd, 1H,  $J = 11.5, 4.0$  Hz), 3.35 (ddd, 1H,  $J = 9.3, 4.3, 2.6$  Hz), 3.48 (dd, 1H,  $J = 11.4, 2.7$  Hz), 3.96 (d, 1H,  $J = 9.4$  Hz), 4.65 (q, 2H,  $J = 14.3$  Hz), 6.64 (dd, 1H,  $J = 8.2, 4.0$  Hz), 7.03 (d, 1H,  $J = 6.8$  Hz), 7.21-7.34 (m, 6H).

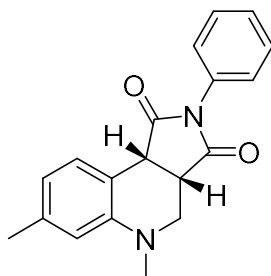

(3aS\*,9bR\*)-5,7-dimethyl-2-phenyl-3a,4,5,9b-tetrahydro-1H-pyrrolo[3,4-c]quinoline-1,3(2H)-dione(**3k**) 99.6 mg. White solid:  $R_f = 0.40$  (petroleum ether/ethyl acetate 6:1); m.p. 193-195 °C;  $^1\text{H NMR}$  (400 MHz,  $\text{CDCl}_3$ )  $\delta$  2.59 (s, 3H), 2.79 (s, 3H), 2.96 (dd, 1H,  $J = 11.2, 4.8$  Hz), 3.51 – 3.55 (m, 1H), 3.59 (ddd, 1H,  $J = 11.3, 4.9, 2.2$  Hz), 4.52 (d, 1H,  $J = 9.8$  Hz), 6.64 (d, 1H,  $J = 8.2$  Hz), 6.82 (d, 1H,  $J = 7.5$  Hz), 7.13 (t, 1H,  $J = 7.9$  Hz), 7.23-7.31 (m, 1H), 7.32 – 7.39 (m, 1H), 7.40-7.46 (m, 3H).

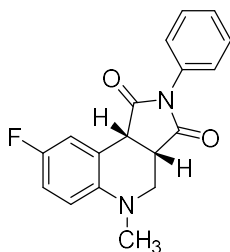

(3aS\*,9bR\*)-8-fluoro-5-methyl-2-phenyl-4,5-dihydro-2H-pyrrolo[3,4-c]quinoline-1,3(3aH,9bH)-dione(**3l**) 107.3 mg. White solid:  $R_f = 0.46$  (petroleum ether/ethyl acetate 30:8); m.p. 172-174 °C;  $^1\text{H NMR}$  (400 MHz,  $\text{CDCl}_3$ )  $\delta$  2.82 (s, 3H), 3.09 (dd, 1H,  $J = 11.4, 4.4$  Hz), 3.55 (ddd, 1H,  $J = 9.6, 4.3, 2.8$  Hz), 3.60 (dd, 1H,  $J = 11.4, 2.8$  Hz), 4.13 (d, 1H,  $J = 9.5$  Hz), 6.69 (dd, 1H,  $J = 9.0, 4.7$  Hz), 6.86 (s, 1H), 6.95 (td, 1H,  $J = 8.6, 3.0$  Hz), 7.25-7.29 (m, 2H), 7.42-7.49 (m, 3H).

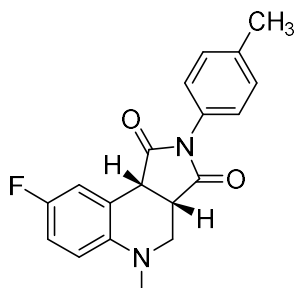

(3aS\*,9bR\*)-8-fluoro-5-methyl-2-(p-tolyl)-3a,4,5,9b-tetrahydro-1H-pyrrolo[3,4-c]quinoline-1,3(2H)-dione(**3m**) 147.4 mg. White solid:  $R_f = 0.46$  (petroleum ether/ethyl acetate 6:1); m.p. 178-181 °C; IR (KBr)  $\nu$  2964, 2867, 1710, 1577, 1504, 1194, 618  $\text{cm}^{-1}$ ;  $^1\text{H NMR}$  (400 MHz,  $\text{CDCl}_3$ )  $\delta$  2.36 (s, 3H), 2.82 (s, 3H), 3.09 (dd, 1H,  $J = 11.4, 4.4$  Hz), 3.53 (ddd, 1H,  $J = 9.6, 4.4, 2.9$  Hz), 3.58 (dd, 1H,  $J = 11.4, 2.9$  Hz), 4.11 (d, 1H,  $J = 9.6$  Hz), 6.68 (dd, 1H,  $J = 9.0, 4.7$  Hz), 6.94 (td, 1H,  $J = 8.6, 3.0$  Hz), 7.12-7.15 (m, 2H), 7.24 (d, 2H,  $J = 8.1$  Hz), 7.28 (dd, 1H,  $J = 9.0, 2.7$  Hz);  $^{13}\text{C NMR}$  (100 MHz,  $\text{CDCl}_3$ )  $\delta$  28.2, 39.8, 42.4, 43.5, 55.7, 113.4, 114.4, 115.7, 119.8, 126.1, 129.3, 129.7, 138.6, 142.8, 153.2, 175.7, 177.3, 177.9; HRMS (ESI) Calcd for  $\text{C}_{19}\text{H}_{18}\text{FN}_2\text{O}_2$   $[\text{M}+\text{H}]^+$ : 325.1352, found 325.1350.

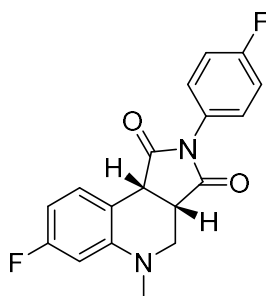

(3aS\*,9bR\*)-8-fluoro-2-(4-fluorophenyl)-5-methyl-3a,4,5,9b-tetrahydro-1H-pyrrolo[3,4-c]quinoline-1,3(2H)-dione(**3n**) 86.9 mg. White solid:  $R_f = 0.34$  (petroleum ether/ethyl acetate 5:1); m.p. 150-152 °C; IR (KBr)  $\nu$  2924, 1709, 1577, 1508, 1425,

1151, 679  $\text{cm}^{-1}$ ;  $^1\text{H}$  NMR (400 MHz,  $\text{CDCl}_3$ )  $\delta$  2.81 (s, 3H), 3.07 (dd, 1H,  $J = 11.4, 4.4$  Hz), 3.53 (ddd, 1H,  $J = 9.6, 4.3, 2.7$  Hz), 3.59 (dd, 1H,  $J = 11.4, 2.7$  Hz), 4.12 (d, 1H,  $J = 9.6$  Hz), 6.67 (dd, 1H,  $J = 9.0, 4.6$  Hz), 6.94 (td, 1H,  $J = 8.6, 3.0$  Hz), 7.09-7.15 (m, 2H), 7.24-7.31 (m, 3H);  $^{13}\text{C}$  NMR (100 MHz,  $\text{CDCl}_3$ )  $\delta$  39.8, 42.1, 43.4, 51.0, 113.4 (d,  $J = 8.0$  Hz), 115.1 (d,  $J = 21.0$  Hz), 116.1 (d,  $J = 22.0$  Hz), 116.9 (d,  $J = 23.0$  Hz), 119.8 (d,  $J = 7.0$  Hz), 128.2 (d,  $J = 9.0$  Hz), 145.0, 155.5, 157.9, 160.9, 163.4, 175.1, 177.4; HRMS (ESI) Calcd for  $\text{C}_{18}\text{H}_{15}\text{F}_2\text{N}_2\text{O}_2$   $[\text{M}+\text{H}]^+$ : 329.1102, found 329.1096.

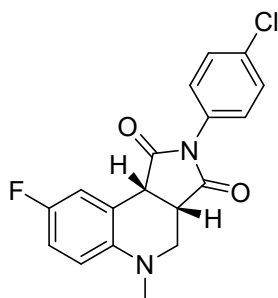

(3a*S*\*,9b*R*\*)-2-(4-chlorophenyl)-8-fluoro-5-methyl-3a,4,5,9b-tetrahydro-1H-pyrrolo[3,4-c]quinoline-1,3(2H)-dione (**3o**) 123.8 mg. White solid:  $R_f = 0.31$  (petroleum ether/ethyl acetate 30:7); m.p. 156-158  $^{\circ}\text{C}$ ; IR (KBr)  $\nu$  2925, 2854, 1718, 1577, 1438, 1133, 619  $\text{cm}^{-1}$ ;  $^1\text{H}$  NMR (400 MHz,  $\text{CDCl}_3$ )  $\delta$  2.81 (s, 3H), 3.08 (ddd, 1H,  $J = 11.4, 4.3, 1.7$  Hz), 3.50-3.56 (m, 1H), 3.59 (dd, 1H,  $J = 11.5, 2.6$  Hz), 4.12 (d, 1H,  $J = 9.4$  Hz), 6.68 (dd, 1H,  $J = 9.0, 4.6$  Hz), 6.95 (td, 1H,  $J = 8.6, 3.0$  Hz), 7.23-7.28 (m, 3H), 7.39-7.43 (m, 2H);  $^{13}\text{C}$  NMR (100 MHz,  $\text{CDCl}_3$ )  $\delta$  39.6, 42.1, 43.3, 50.9, 113.3 (d,  $J = 7.6$  Hz), 114.9 (d,  $J = 21.8$  Hz), 116.7 (d,  $J = 23.1$  Hz), 119.9 (d,  $J = 7.7$  Hz), 127.5, 129.0, 130.3, 134.1, 144.9, 155.2, 157.6, 160.1, 177.2, 177.3; HRMS (ESI) Calcd for  $\text{C}_{18}\text{H}_{15}\text{ClFN}_2\text{O}_2$   $[\text{M}+\text{H}]^+$ : 345.0806, found 345.0806.

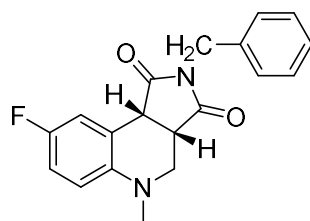

(3a*S*\*,9b*R*\*)-2-benzyl-8-fluoro-5-methyl-3a,4,5,9b-tetrahydro-1H-pyrrolo[3,4-c]quinoline-1,3(2H)-dione (**3p**) 87.4 mg. White solid:  $R_f = 0.38$  (petroleum ether/ethyl acetate 30:7); m.p. 130-132  $^{\circ}\text{C}$ ; IR (KBr)  $\nu$  2925, 1701, 1577, 1495, 1438, 1130, 619  $\text{cm}^{-1}$ ;  $^1\text{H}$  NMR (400 MHz,  $\text{CDCl}_3$ )  $\delta$  2.77 (s, 3H), 2.99 (dd, 1H,  $J = 11.4, 4.8$  Hz), 3.35 (ddd, 1H,  $J = 9.4, 4.5, 2.8$  Hz), 3.47 (dd, 1H,  $J = 11.5, 2.8$  Hz), 3.94 (d, 1H,  $J = 9.4$  Hz), 4.66 (q, 2H,  $J = 14.3$  Hz), 6.62 (dd, 1H,  $J = 9.0, 4.6$  Hz), 6.91 (td, 1H,  $J = 8.6, 3.0$  Hz), 7.20 - 7.22 (m, 1H), 7.23 - 7.26 (m, 1H), 7.31 - 7.23 (m, 4H);  $^{13}\text{C}$  NMR (100 MHz,  $\text{CDCl}_3$ )  $\delta$  39.6, 42.2, 42.9, 43.5, 51.1, 113.3 (d,  $J = 8.0$  Hz), 114.9 (d,  $J = 22.0$  Hz), 116.9 (d,  $J = 23.0$  Hz), 120.3 (d,  $J = 8.0$  Hz), 127.9, 128.3, 128.6, 135.4, 144.93, 144.95, 155.45, 157.82, 175.8, 178.1; HRMS (ESI) Calcd for  $\text{C}_{19}\text{H}_{18}\text{FN}_2\text{O}_2$   $[\text{M}+\text{H}]^+$ : 325.1352, found 325.1352.



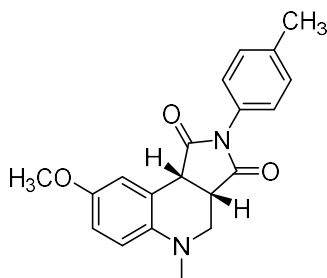

(3a*S*\*,9b*R*\*)-8-methoxy-5-methyl-2-(*p*-tolyl)-3a,4,5,9b-tetrahydro-1*H*-pyrrolo[3,4-*c*]quinoline-1,3(2*H*)-dione(**3q**) 128.7 mg. White solid:  $R_f = 0.37$  (petroleum ether/ethyl acetate 30:8); m.p. 212–214 °C;  $^1\text{H NMR}$  (400 MHz,  $\text{CDCl}_3$ )  $\delta$  2.38 (s, 3H), 2.81 (s, 3H), 3.07(dd, 1H,  $J = 11.2, 4.4$  Hz), 3.38 (s, 3H), 3.53 (ddd, 1H,  $J = 9.4, 4.2, 2.8$  Hz), 3.58 (dd, 1H,  $J = 11.6, 2.8$  Hz), 4.11 (d, 1H,  $J = 9.6$  Hz), 6.66 (dd, 1H,  $J = 8.8, 4.8$  Hz), 6.93 (td, 1H,  $J = 8.4, 2.9$  Hz), 7.12 – 7.15 (m, 2H), 7.23-7.29 (m, 3H).

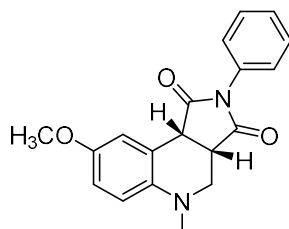

(3a*S*\*,9b*R*\*)-8-methoxy-5-methyl-2-phenyl-3a,4,5,9b-tetrahydro-1*H*-pyrrolo[3,4-*c*]quinoline-1,3(2*H*)-dione(**3r**) 95.1 mg. White solid:  $R_f = 0.41$  (petroleum ether/ethyl acetate 30:8); m.p. 164-166 °C;  $^1\text{H NMR}$  (400 MHz,  $\text{CDCl}_3$ )  $\delta$  2.79 (s, 3H), 3.03 (dd, 1H,  $J = 11.3, 4.3$  Hz), 3.52 (ddd, 1H,  $J = 9.5, 4.3, 2.8$  Hz), 3.56 (dd, 1H,  $J = 11.2, 2.8$  Hz), 3.79 (s, 3H), 4.13 (d, 1H,  $J = 9.5$  Hz), 6.68 (d, 1H,  $J = 8.9$  Hz), 6.81 (dd, 1H,  $J = 8.9, 2.9$  Hz), 7.13 (d, 1H,  $J = 2.8$  Hz), 7.26-7.28 (m, 2H), 7.34 – 7.38 (m, 1H), 7.40-7.45 (m, 2H).

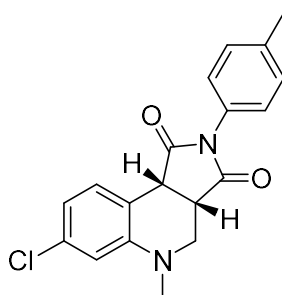

(3a*S*\*,9b*R*\*)-8-chloro-5-methyl-2-(*p*-tolyl)-3a,4,5,9b-tetrahydro-1*H*-pyrrolo[3,4-*c*]quinoline-1,3(2*H*)-dione(**3s**) 161.3 mg. White solid:  $R_f = 0.37$  (petroleum ether/ethyl acetate 30:8); m.p. 189-191 °C; IR (KBr)  $\nu$  2958, 1707, 1577, 1512, 1497, 1395, 648  $\text{cm}^{-1}$ ;  $^1\text{H NMR}$  (400 MHz,  $\text{CDCl}_3$ )  $\delta$  2.36 (s, 3H), 2.82 (s, 3H), 3.10 (dd, 1H,  $J = 11.5, 4.4$  Hz), 3.52 (ddd, 1H,  $J = 9.6, 4.4, 2.8$  Hz), 3.60 (dd, 1H,  $J = 11.5, 2.8$  Hz), 4.10 (d, 1H,  $J = 9.6$  Hz), 6.60 (d, 1H,  $J = 8.8$  Hz), 7.11-7.15 (m, 2H), 7.18 (dd, 1H,  $J = 8.7, 2.5$  Hz), 7.24 (d, 2H,  $J = 8.2$  Hz), 7.51 (d, 1H,  $J = 2.0$  Hz);  $^{13}\text{C NMR}$  (100 MHz,  $\text{CDCl}_3$ )  $\delta$  21.2, 39.5, 41.8, 43.2, 50.5, 113.8, 120.0, 124.5, 126.1, 128.5, 129.2, 129.7,

130.0, 138.7, 147.0, 175.2, 177.4; HRMS (ESI) Calcd for C<sub>19</sub>H<sub>18</sub>ClN<sub>2</sub>O<sub>2</sub> [M+H]<sup>+</sup>: 341.1057, found 341.1058.

5. <sup>1</sup>H NMR (400MHz, CDCl<sub>3</sub>) and <sup>13</sup>C NMR (100MHz, CDCl<sub>3</sub>) of compounds 3a-3s

3a

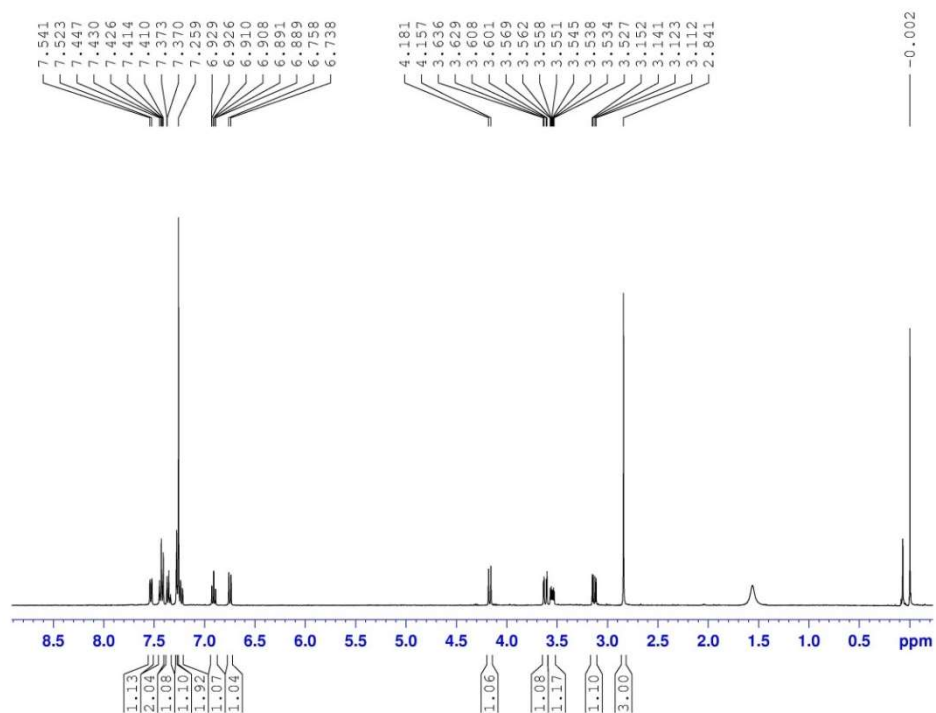

3b

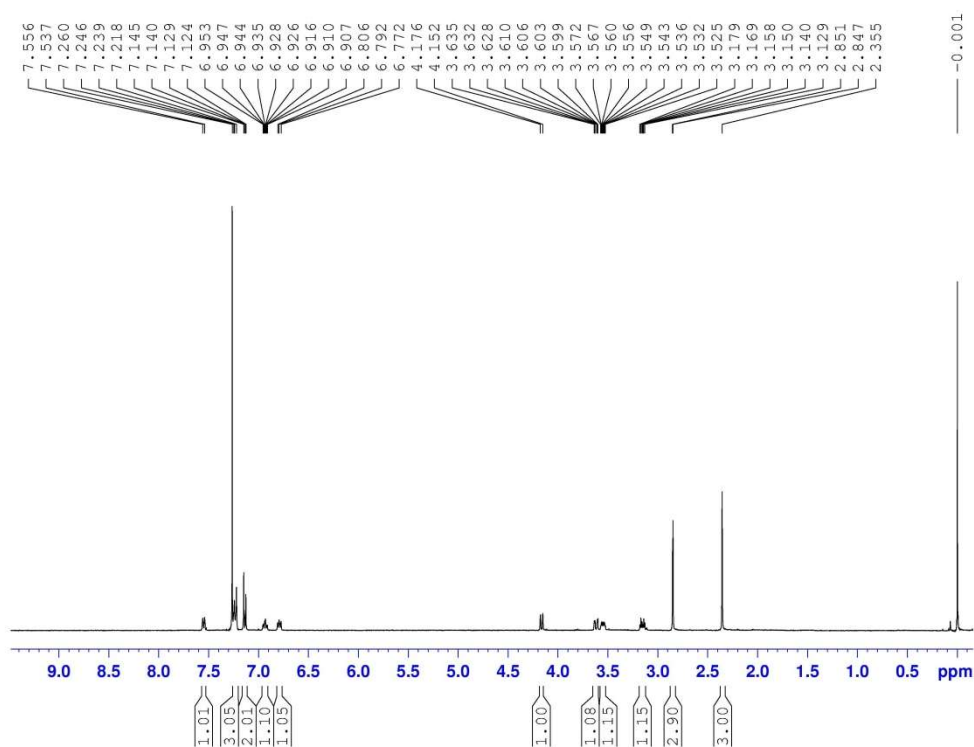

3c

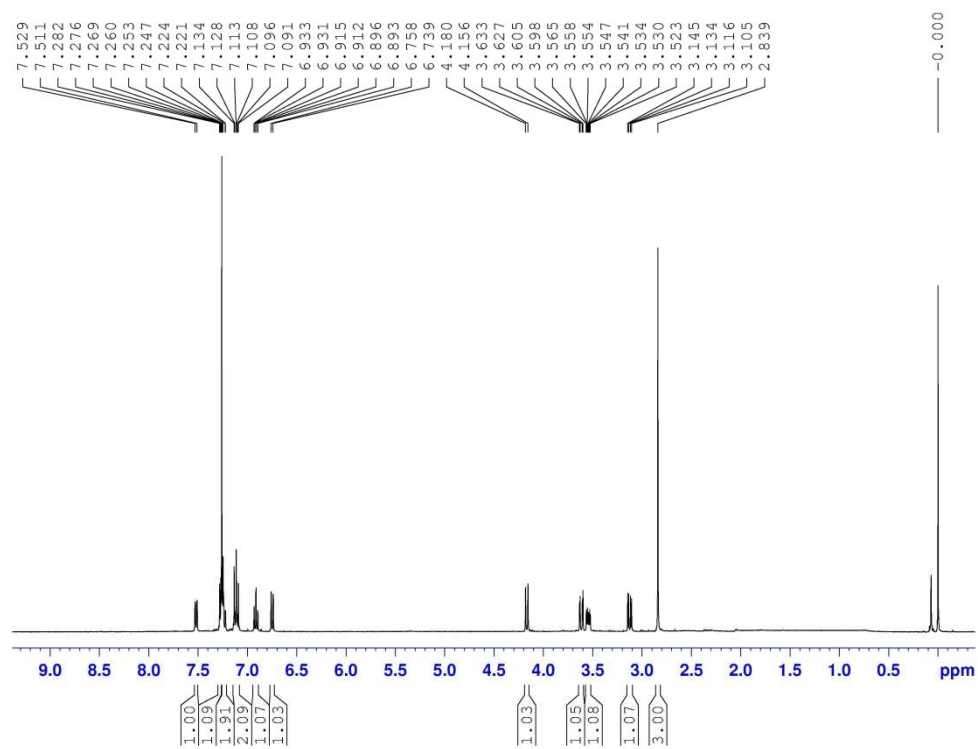

3d

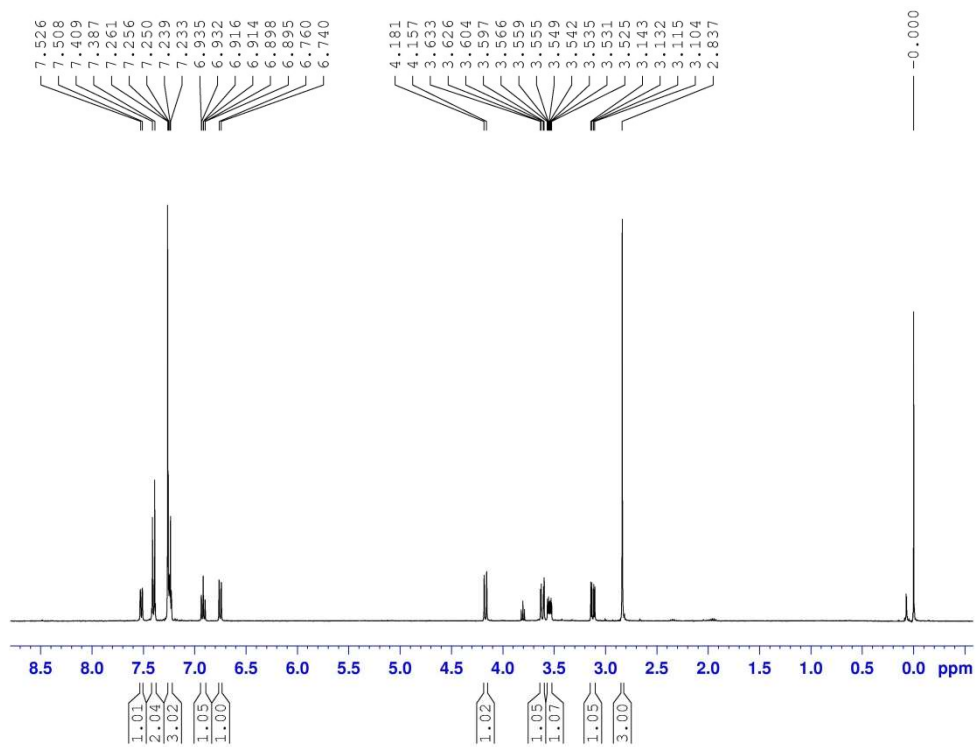

3e

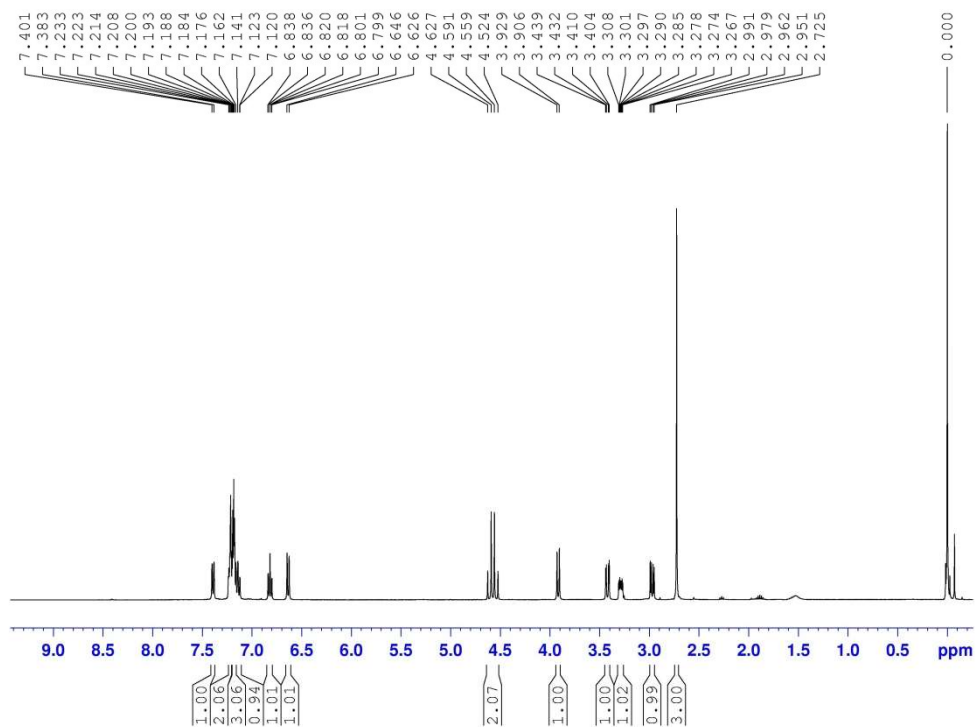

3f

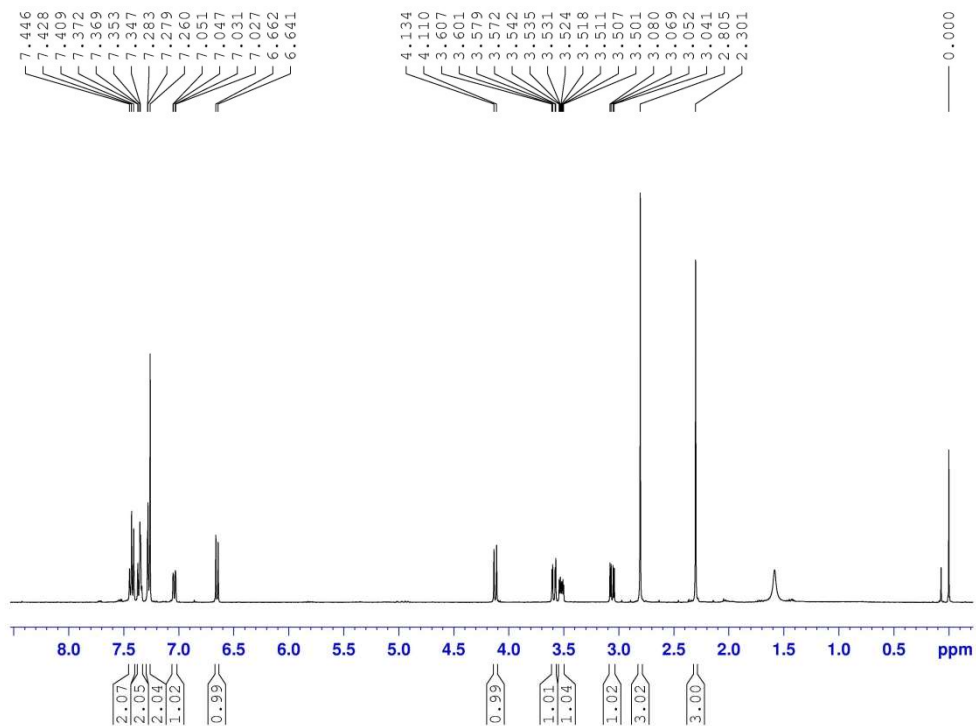

3g

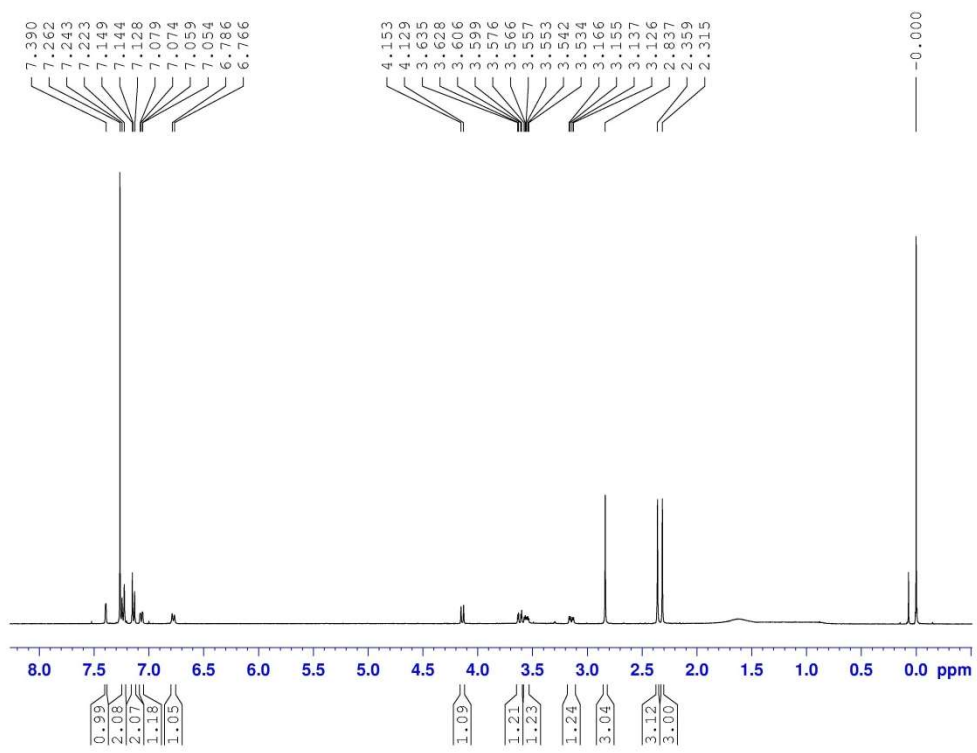

3h

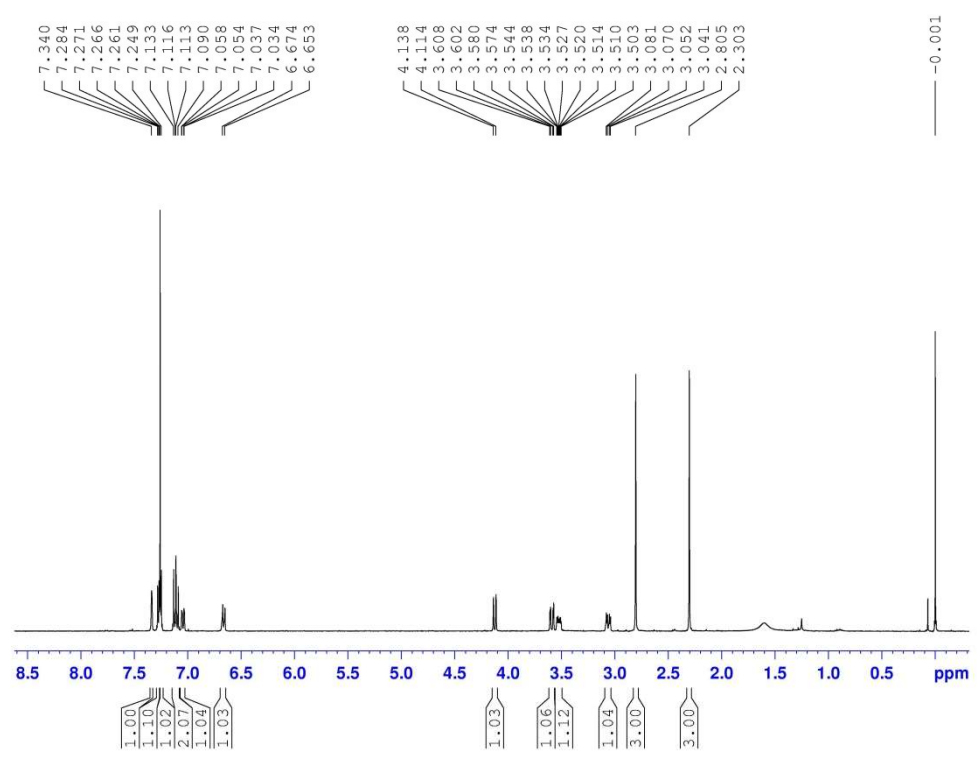

3i

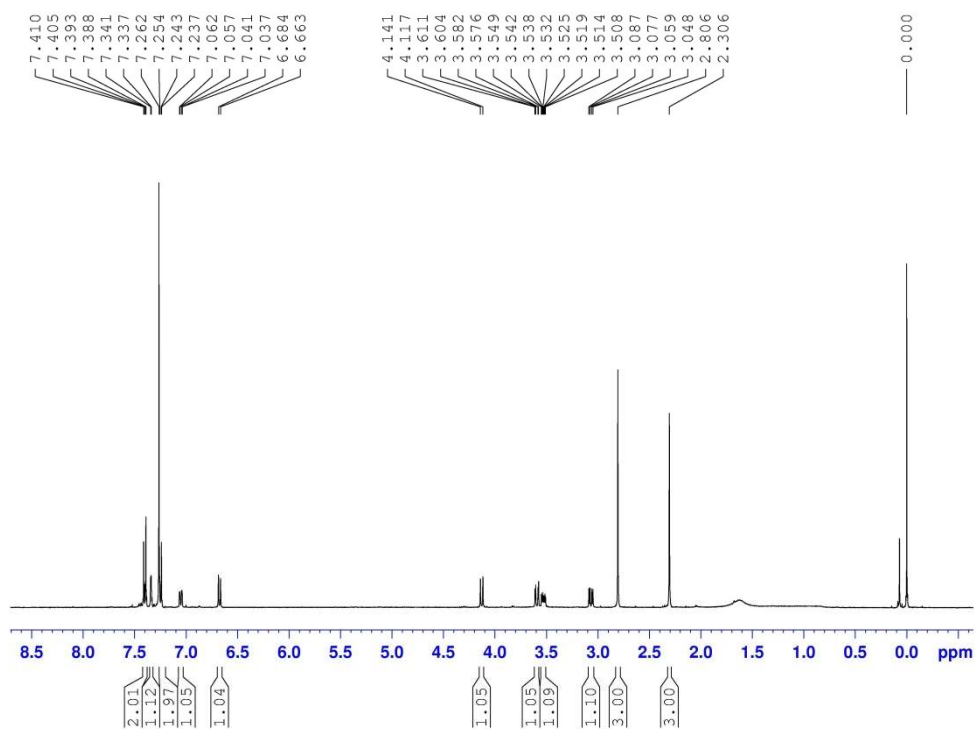

3j

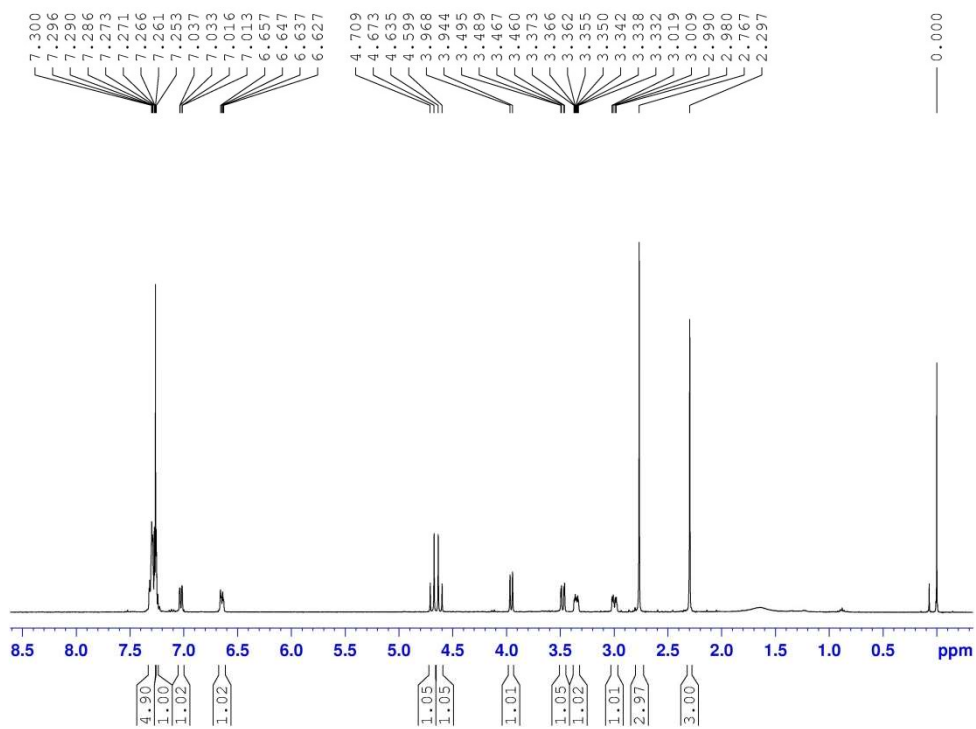

3k

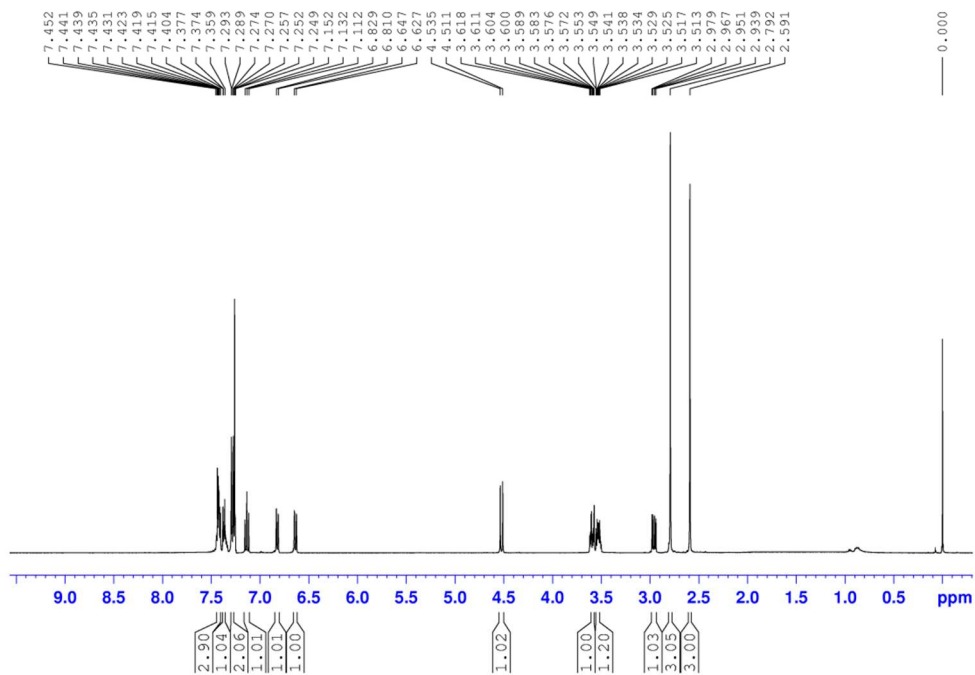

3l

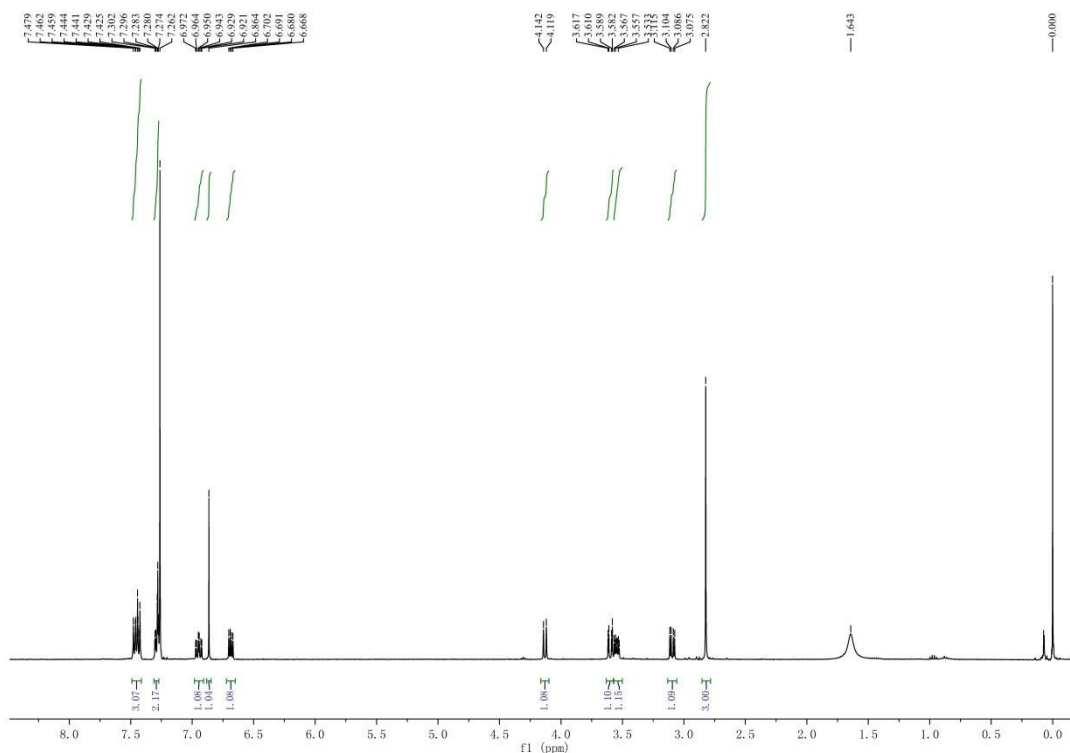

3m

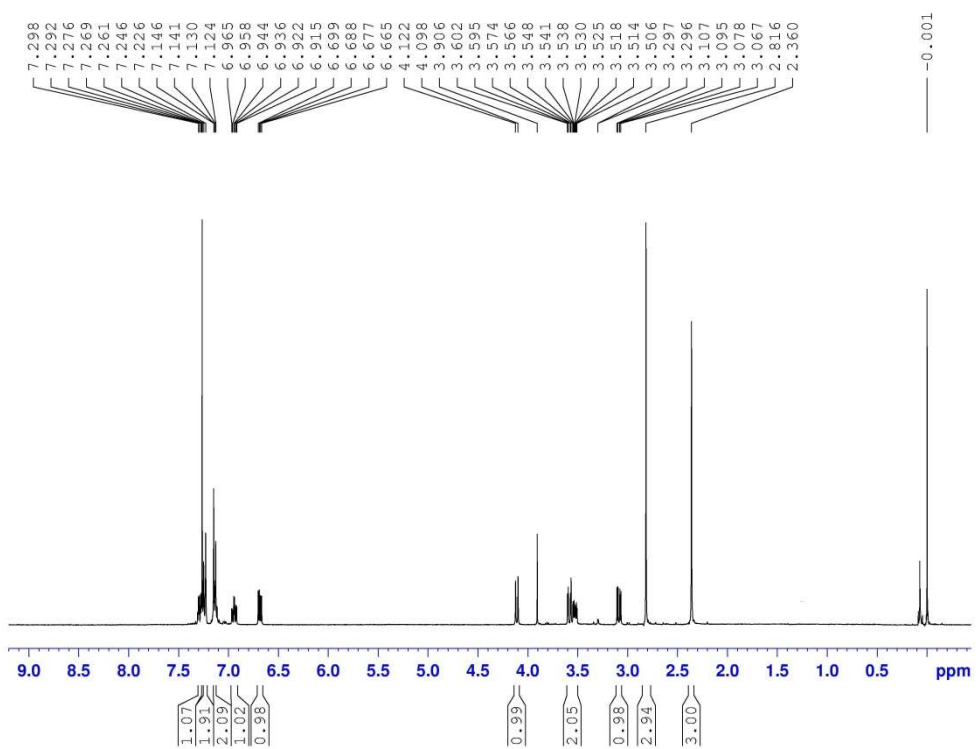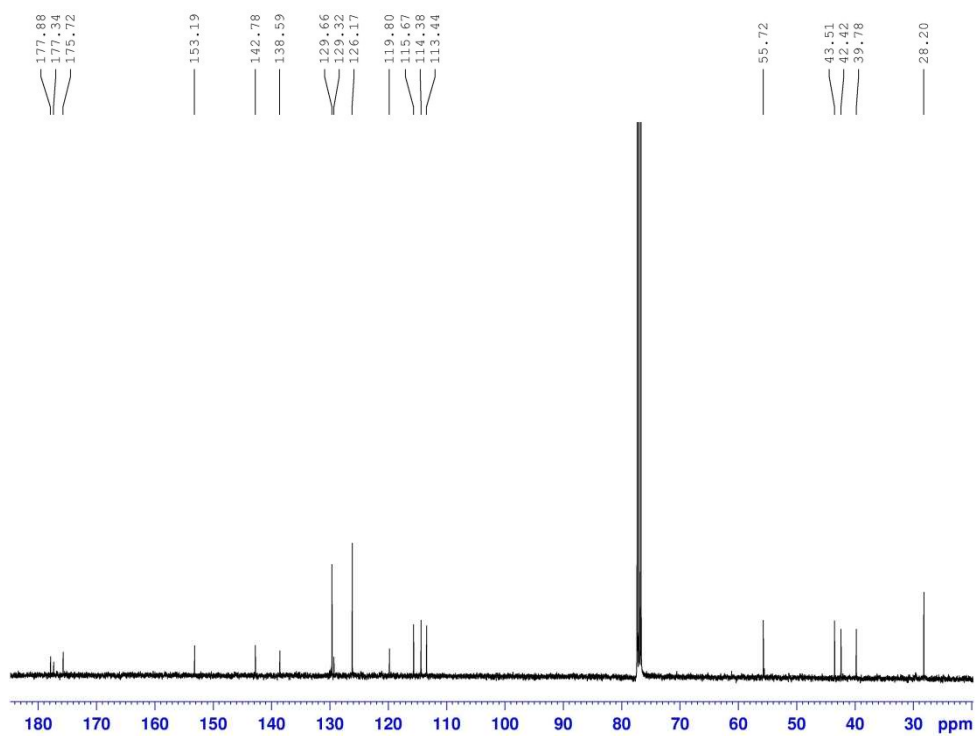



3n

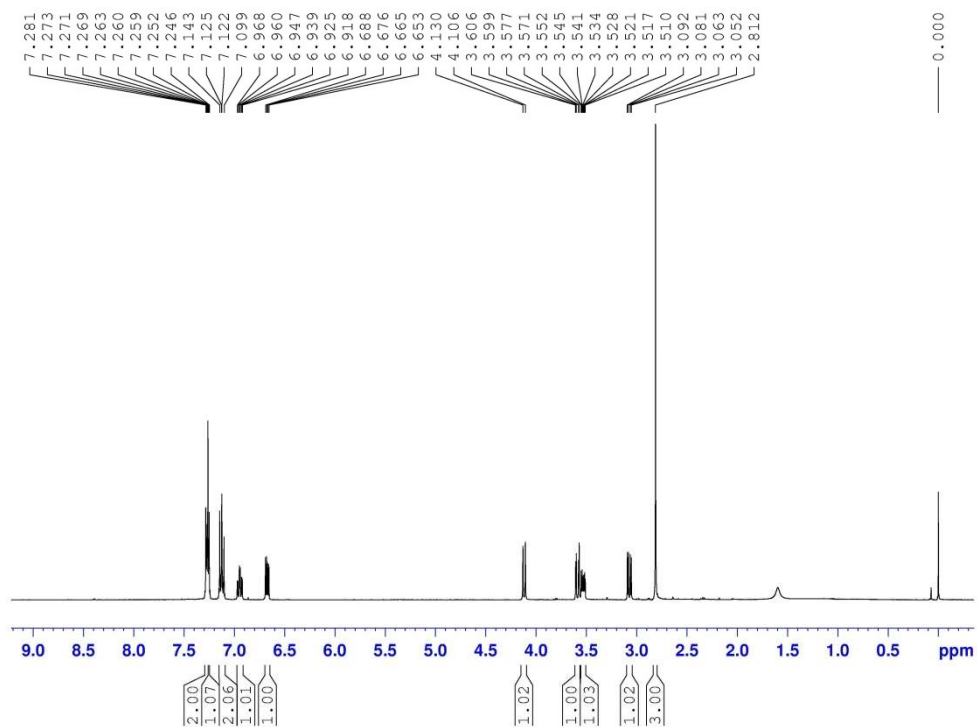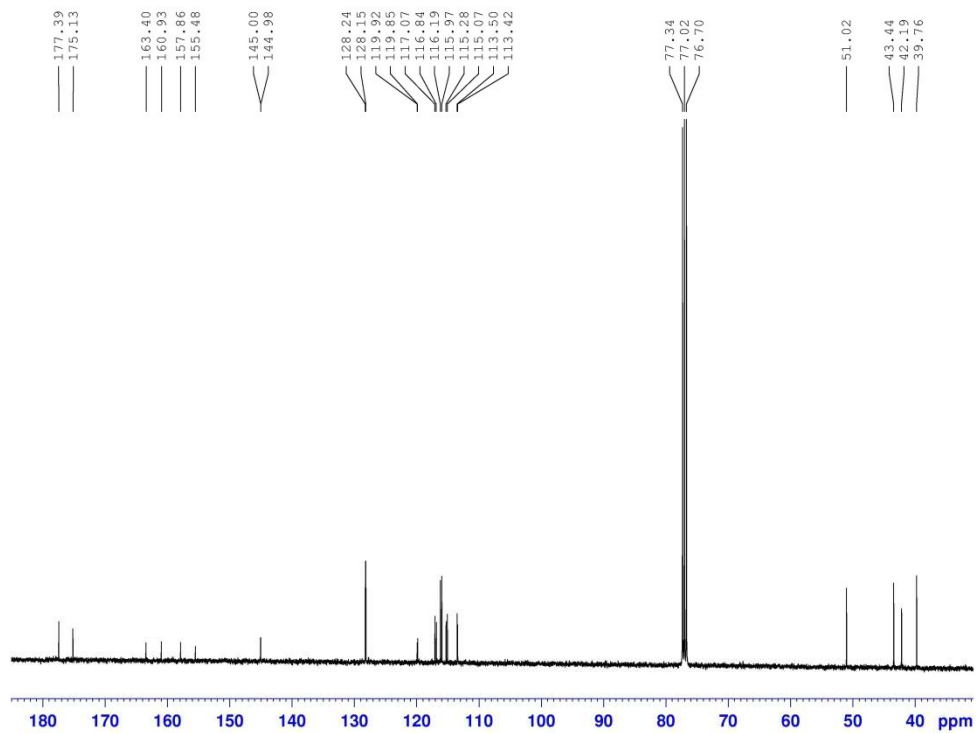

30

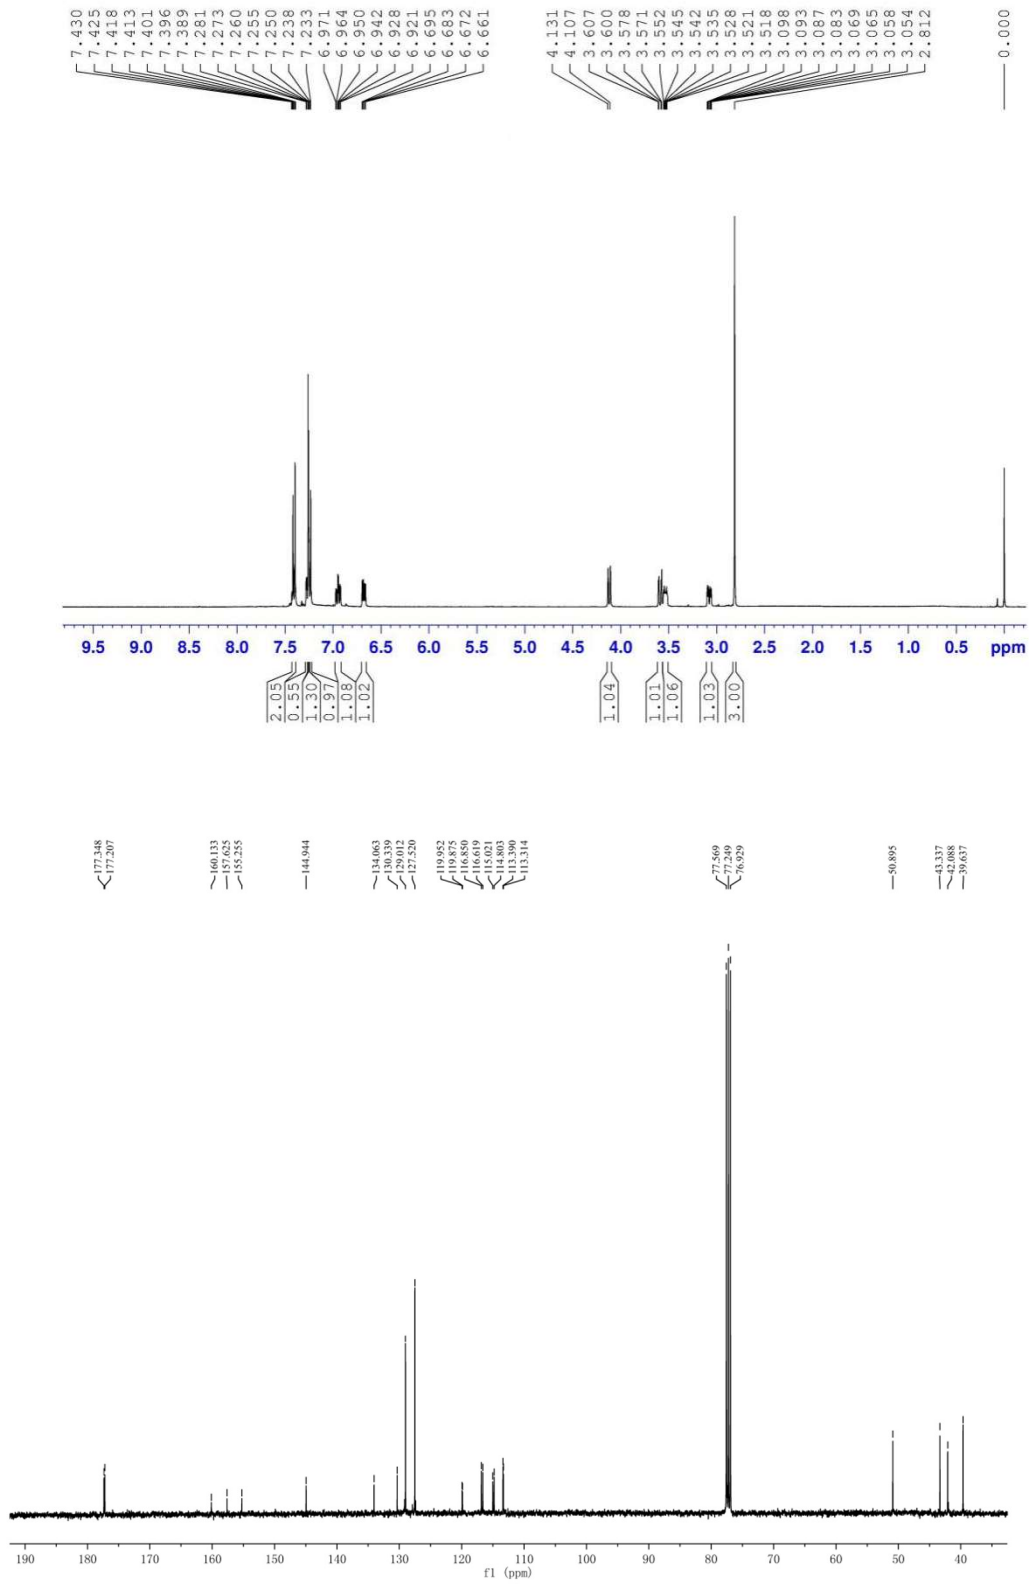

3p

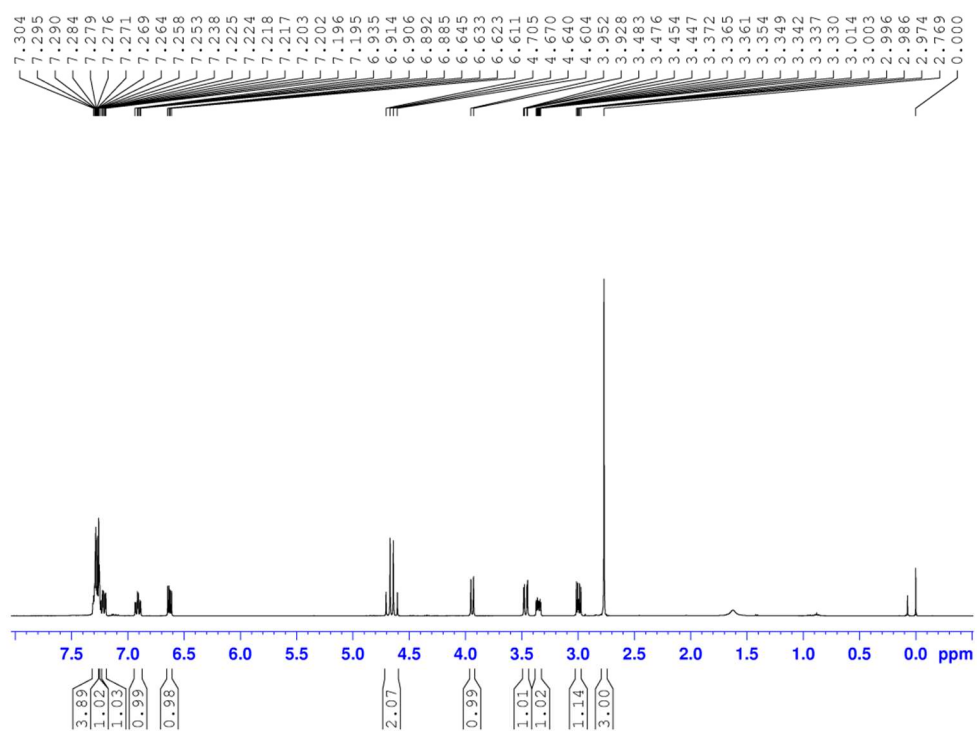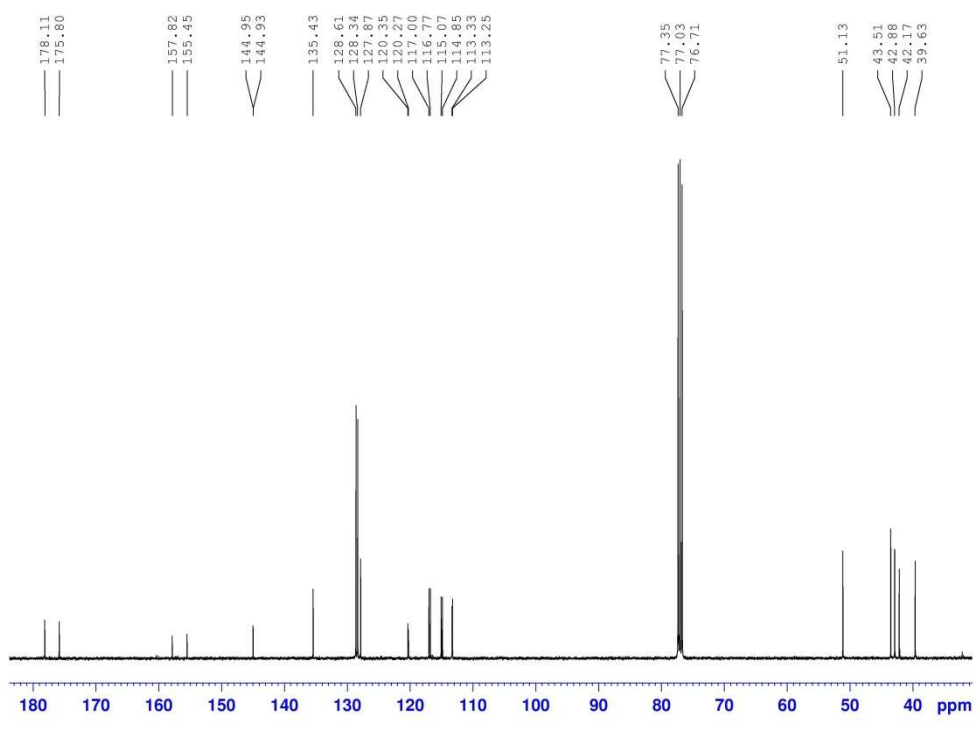

3q

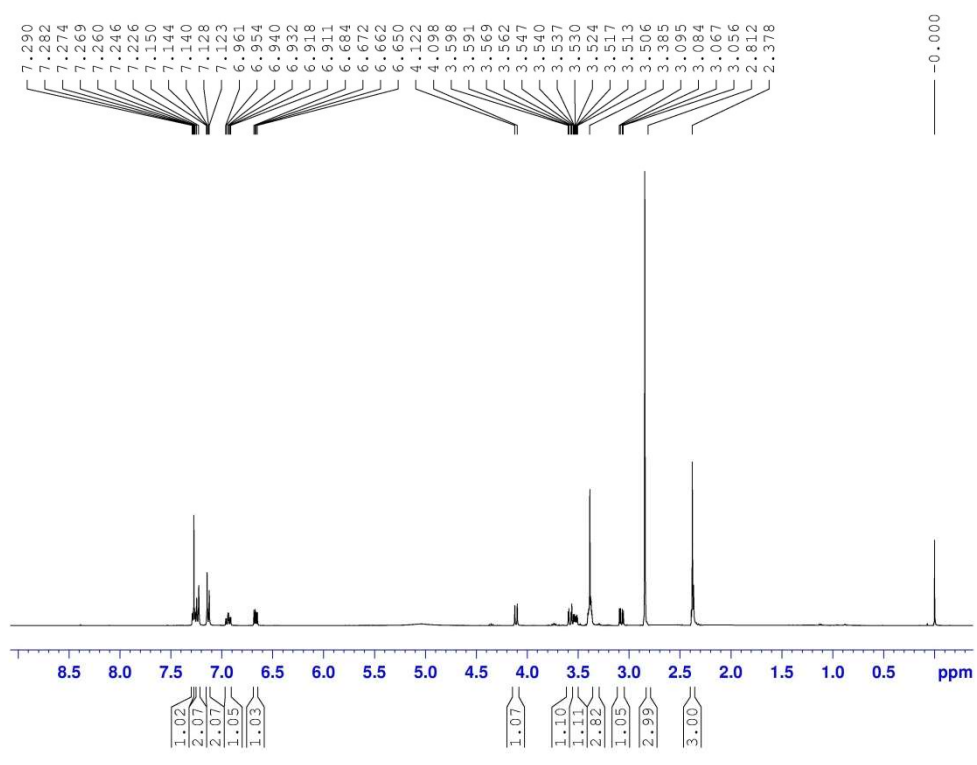

3r

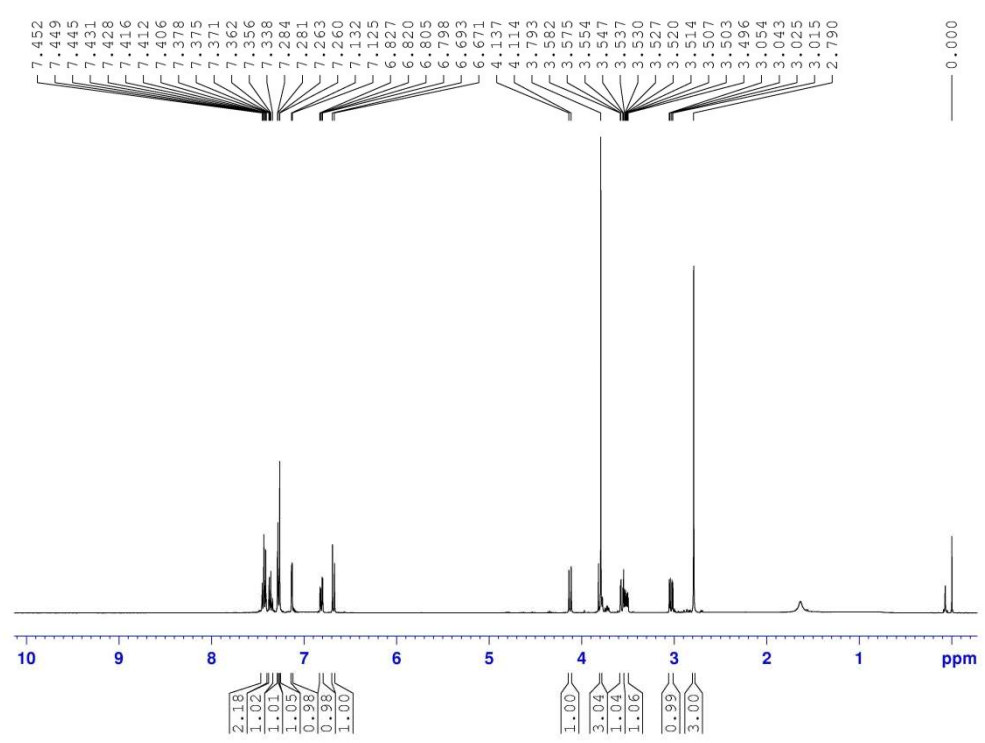

3s

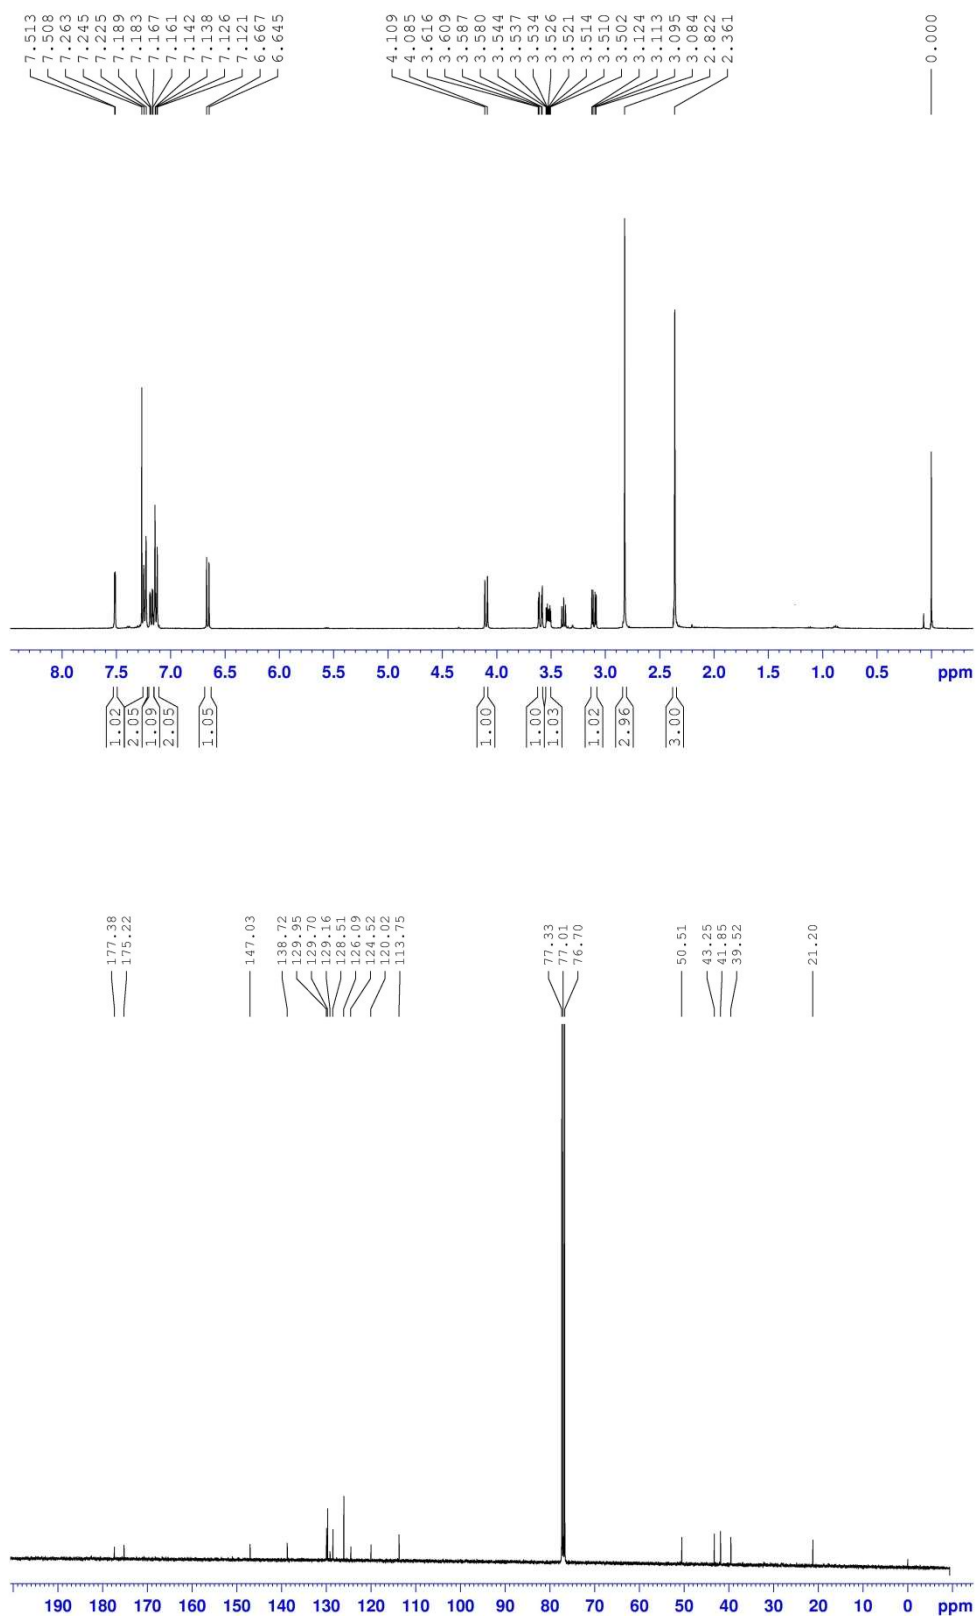

Supplement: c7ra01045a1.pdf [file c7ra01045a1.pdf]
